# Supplementary material for: (PS)2-v2: template-based protein structure prediction server
Source: PubMed Central journal article supplement (PMC2775752; doi:10.1186/1471-2105-10-366), 2009-10-31
Supplement: 1471-2105-10-366-S3.pdf [file 1471-2105-10-366-S3.pdf]

**Table S1. The summary of 154 TBM targets in CASP8**

| Target   | Residues | Best templates | LGA_S (%) | RMSD | Sequence identity (%) |
|----------|----------|----------------|-----------|------|-----------------------|
| T0388-D1 | 164      | 2p31A          | 92.16     | 0.93 | 56.5                  |
| T0389-D1 | 134      | 2oucA          | 83.87     | 1.96 | 30.7                  |
| T0390-D1 | 124      | 1shxB          | 93.59     | 1.36 | 52.1                  |
| T0391-D1 | 128      | 1z01_F         | 72.34     | 1.89 | 18.3                  |
| T0392-D1 | 82       | 1vaeA          | 93.88     | 1.56 | 84.2                  |
| T0393-D1 | 159      | 2f1kA          | 84.24     | 2.00 | 18.3                  |
| T0393-D2 | 99       | 2i76A          | 89.17     | 1.97 | 24.2                  |
| T0394-D1 | 238      | 1h2eA          | 74.08     | 1.67 | 26.1                  |
| T0395-D1 | 218      | 1surA          | 57.48     | 2.03 | 17.5                  |
| T0396-D1 | 102      | 1jraA          | 93.11     | 1.33 | 24.2                  |
| T0397-D2 | 68       | 2yu9B          | 89.00     | 1.99 | 8.8                   |
| T0398-D1 | 143      | 2rirG          | 99.12     | 0.67 | 58.0                  |
| T0398-D2 | 147      | 2rirE          | 99.57     | 0.63 | 66.0                  |
| T0399-D1 | 162      | 1s0wC          | 54.95     | 2.59 | 16.7                  |
| T0400-D1 | 155      | 2q7bA          | 94.01     | 1.32 | 33.3                  |
| T0401-D1 | 127      | 2prvB          | 67.58     | 2.18 | 21.1                  |
| T0402-D1 | 114      | 1rfeA          | 91.20     | 1.62 | 18.8                  |
| T0404-D1 | 79       | 2cz4C          | 96.18     | 0.98 | 28.2                  |
| T0406-D1 | 147      | 2ou6A          | 69.82     | 1.96 | 13.3                  |
| T0407-D1 | 231      | 2anuC          | 57.38     | 2.27 | 22.8                  |
| T0407-D2 | 97       | 1z9oA          | 59.11     | 2.38 | 10.0                  |
| T0408-D1 | 98       | 2af7F          | 85.74     | 2.12 | 19.6                  |
| T0409-D1 | 62       | 2vnuD          | 83.76     | 1.55 | 12.7                  |
| T0411-D1 | 118      | 1e0cA          | 80.10     | 1.85 | 22.3                  |
| T0412-D1 | 165      | 2o0yB          | 83.71     | 1.66 | 18.2                  |
| T0413-D1 | 282      | 1jjiD          | 44.05     | 2.40 | 15.3                  |
| T0414-D1 | 127      | 2b5hA          | 71.97     | 1.96 | 7.8                   |
| T0415-D1 | 107      | 3bs1A          | 78.21     | 1.79 | 21.5                  |
| T0416-D1 | 232      | 2qgnA          | 93.82     | 1.39 | 46.8                  |
| T0417-D1 | 153      | 2cnmC          | 77.10     | 2.00 | 14.7                  |
| T0418-D1 | 141      | 2hszB          | 91.88     | 1.46 | 26.1                  |
| T0418-D2 | 69       | 2ah5A          | 90.49     | 1.38 | 24.2                  |
| T0419-D1 | 224      | 1e98A          | 47.09     | 2.42 | 14.7                  |
| T0419-D2 | 241      | 2plrA          | 45.58     | 2.44 | 12.1                  |
| T0420-D1 | 168      | 1hv9B          | 81.14     | 1.94 | 17.3                  |
| T0421-D1 | 221      | 2plrA          | 47.12     | 2.29 | 19.8                  |
| T0422-D1 | 200      | 3b9pA          | 85.21     | 1.40 | 57.2                  |
| T0422-D2 | 80       | 2qpaB          | 92.77     | 1.53 | 21.5                  |
| T0423-D1 | 147      | 2otmC          | 93.38     | 1.13 | 32.4                  |
| T0424-D1 | 175      | 3cddD          | 88.63     | 1.67 | 21.4                  |
| T0424-D2 | 84       | 1wruA          | 88.60     | 1.81 | 25.6                  |
| T0424-D3 | 57       | 3cddF          | 90.69     | 1.66 | 19.6                  |
| T0425-D1 | 179      | 1jwqA          | 83.03     | 1.97 | 24.3                  |
| T0426-D1 | 257      | 2fw4A          | 98.82     | 0.77 | 60.3                  |
| T0427-D1 | 218      | 1ppjA          | 74.81     | 1.93 | 14.4                  |
| T0427-D2 | 184      | 1hr7C          | 80.35     | 1.96 | 15.7                  |
| T0428-D1 | 229      | 1xq9B          | 98.72     | 0.78 | 63.8                  |
| T0429-D1 | 55       | 2f5kB          | 92.93     | 1.23 | 22.6                  |
| T0429-D2 | 75       | 2d9tA          | 68.77     | 1.80 | 10.2                  |
| T0430-D1 | 138      | 1zwsB          | 55.73     | 1.88 | 22.4                  |
| T0430-D2 | 189      | 2bheA          | 50.17     | 2.05 | 22.9                  |
| T0431-D1 | 101      | 2iagB          | 86.97     | 1.53 | 32.3                  |
| T0431-D2 | 357      | 2iagA          | 88.74     | 1.56 | 33.1                  |
| T0432-D1 | 130      | 2dkwA          | 86.85     | 1.59 | 66.9                  |
| T0433-D1 | 199      | 1ybvA          | 91.92     | 1.65 | 21.6                  |
| T0434-D1 | 151      | 1mvhA          | 63.75     | 2.17 | 23.4                  |
| T0435-D1 | 118      | 2qpwA          | 85.60     | 1.57 | 32.4                  |
| T0436-D1 | 405      | 1vp4B          | 59.20     | 2.23 | 19.2                  |

|          |     |       |       |      |      |
|----------|-----|-------|-------|------|------|
| T0437-D1 | 68  | 2jz5A | 91.26 | 1.82 | 33.9 |
| T0438-D1 | 164 | 2oasA | 90.65 | 1.44 | 29.8 |
| T0438-D2 | 223 | 2oasA | 97.21 | 1.06 | 49.8 |
| T0440-D1 | 275 | 2yz5A | 79.69 | 1.64 | 26.6 |
| T0441-D1 | 124 | 2driA | 89.00 | 1.78 | 17.2 |
| T0441-D2 | 146 | 1sxgA | 93.02 | 1.24 | 24.7 |
| T0442-D1 | 157 | 2pifB | 92.19 | 1.51 | 79.4 |
| T0442-D2 | 73  | 2pifB | 92.19 | 1.51 | 69.9 |
| T0443-D1 | 66  | 2aplA | 68.10 | 2.54 | 11.9 |
| T0443-D3 | 66  | 1onvA | 68.03 | 1.74 | 7.0  |
| T0444-D1 | 276 | 1jk0A | 98.00 | 0.87 | 66.3 |
| T0445-D1 | 155 | 2hf2B | 93.92 | 1.32 | 29.4 |
| T0445-D2 | 107 | 1nf2C | 85.13 | 1.99 | 9.7  |
| T0446-D1 | 57  | 3b77F | 86.67 | 1.95 | 18.2 |
| T0446-D2 | 50  | 2j0kA | 91.23 | 1.72 | 16.3 |
| T0447-D1 | 542 | 1eg7A | 95.15 | 1.12 | 52.3 |
| T0448-D1 | 207 | 3bzwE | 89.15 | 1.57 | 26.0 |
| T0449-D1 | 296 | 2cisA | 62.10 | 1.80 | 21.5 |
| T0450-D1 | 491 | 2rghA | 91.31 | 1.41 | 42.2 |
| T0451-D1 | 127 | 1s5aD | 84.14 | 1.87 | 20.8 |
| T0452-D1 | 156 | 3c8mA | 89.16 | 1.83 | 29.6 |
| T0452-D2 | 163 | 2ejwA | 93.68 | 1.30 | 42.5 |
| T0453-D1 | 86  | 2plsI | 91.42 | 1.66 | 38.8 |
| T0454-D1 | 52  | 2jj7A | 97.76 | 0.98 | 36.5 |
| T0454-D2 | 140 | 1vi0B | 75.11 | 2.16 | 10.2 |
| T0455-D1 | 139 | 3bwgB | 93.16 | 1.59 | 25.2 |
| T0456-D1 | 87  | 2gs7B | 88.75 | 1.67 | 22.6 |
| T0456-D2 | 175 | 2qg5B | 90.02 | 1.20 | 44.4 |
| T0457-D1 | 194 | 1wpmB | 63.49 | 2.30 | 16.7 |
| T0457-D2 | 118 | 1ir6A | 59.63 | 2.55 | 12.5 |
| T0458-D1 | 77  | 2okaA | 99.39 | 0.71 | 55.8 |
| T0459-D1 | 91  | 1yyvA | 91.67 | 1.56 | 25.8 |
| T0460-D1 | 80  | 2fug5 | 56.59 | 2.51 | 16.7 |
| T0461-D1 | 154 | 2b3jB | 89.90 | 1.32 | 31.5 |
| T0462-D1 | 70  | 2gcxA | 82.80 | 2.05 | 33.3 |
| T0462-D2 | 63  | 2gcxA | 76.93 | 2.17 | 17.2 |
| T0463-D1 | 211 | 1he3A | 81.59 | 1.94 | 23.3 |
| T0464-D1 | 69  | 1b6bA | 50.32 | 2.62 | 5.6  |
| T0466-D1 | 72  | 1xjvA | 74.89 | 1.94 | 1.6  |
| T0468-D1 | 61  | 2oq0C | 66.59 | 2.54 | 11.5 |
| T0469-D1 | 63  | 2fi0A | 79.54 | 2.17 | 23.0 |
| T0470-D1 | 111 | 2qgsA | 92.19 | 1.92 | 35.1 |
| T0470-D2 | 77  | 2qgsB | 96.54 | 1.19 | 49.3 |
| T0471-D1 | 88  | 2r3sA | 84.88 | 1.99 | 10.6 |
| T0472-D1 | 58  | 1uwba | 88.70 | 1.99 | 15.5 |
| T0472-D2 | 45  | 3bidE | 90.99 | 1.34 | 18.6 |
| T0473-D1 | 60  | 2fi0A | 82.34 | 2.19 | 21.1 |
| T0474-D1 | 41  | 2ay0C | 97.88 | 0.94 | 12.2 |
| T0475-D1 | 118 | 1qjgF | 89.44 | 1.80 | 22.4 |
| T0476-D1 | 87  | 2zbaA | 46.85 | 2.84 | 12.5 |
| T0477-D1 | 240 | 2db3A | 82.43 | 1.81 | 32.6 |
| T0478-D1 | 126 | 1xlyA | 70.28 | 2.50 | 8.6  |
| T0478-D2 | 130 | 1xlyB | 68.69 | 2.29 | 9.5  |
| T0479-D1 | 122 | 1zkiB | 95.23 | 1.21 | 29.2 |
| T0480-D1 | 30  | 1dl6A | 89.62 | 1.74 | 23.3 |
| T0481-D1 | 135 | 1rxqA | 67.20 | 2.21 | 14.5 |
| T0483-D1 | 273 | 1xr1A | 84.10 | 1.81 | 31.5 |
| T0485-D1 | 207 | 2o57C | 70.41 | 2.19 | 20.6 |
| T0486-D1 | 214 | 2vssF | 92.29 | 1.55 | 24.8 |
| T0487-D1 | 194 | 2f8sB | 62.09 | 2.14 | 18.8 |
| T0487-D2 | 134 | 2f8sB | 49.37 | 2.71 | 13.6 |
| T0487-D3 | 71  | 2f8sB | 67.56 | 2.22 | 7.6  |

|          |     |       |       |      |      |
|----------|-----|-------|-------|------|------|
| T0487-D4 | 87  | 1si2A | 72.02 | 2.34 | 12.2 |
| T0487-D5 | 147 | 1w9hA | 54.94 | 2.65 | 14.7 |
| T0488-D1 | 86  | 2qg1A | 95.98 | 1.08 | 35.3 |
| T0489-D1 | 210 | 1zxvA | 38.36 | 2.70 | 10.4 |
| T0490-D1 | 361 | 1ryiA | 72.44 | 2.04 | 16.8 |
| T0491-D1 | 96  | 1wocD | 92.40 | 1.49 | 27.7 |
| T0492-D1 | 69  | 2gcxA | 81.58 | 2.00 | 24.6 |
| T0493-D1 | 149 | 2is4A | 89.58 | 1.85 | 23.5 |
| T0494-D1 | 345 | 2eu9A | 82.74 | 1.56 | 32.7 |
| T0495-D1 | 139 | 2okfB | 46.66 | 2.47 | 11.2 |
| T0496-D2 | 45  | 3bvoB | 99.13 | 0.78 | 13.3 |
| T0497-D1 | 124 | 2qeaA | 88.52 | 2.00 | 29.8 |
| T0498-D1 | 45  | 2fs1A | 94.64 | 1.22 | 62.2 |
| T0499-D1 | 56  | 1qkzA | 93.48 | 1.40 | 60.7 |
| T0501-D1 | 213 | 1wpnB | 57.16 | 2.29 | 17.0 |
| T0501-D2 | 126 | 1ir6A | 62.17 | 2.36 | 11.9 |
| T0502-D1 | 93  | 2k50A | 87.64 | 1.68 | 27.5 |
| T0503-D1 | 144 | 1o3rA | 75.86 | 2.06 | 16.7 |
| T0504-D1 | 62  | 2f5kA | 86.16 | 1.27 | 7.3  |
| T0504-D2 | 90  | 2hqeA | 62.17 | 2.11 | 14.3 |
| T0504-D3 | 53  | 2r5aA | 95.44 | 1.42 | 17.0 |
| T0505-D1 | 159 | 1rkqA | 92.85 | 1.29 | 35.7 |
| T0505-D2 | 104 | 2hf2B | 68.76 | 1.96 | 5.5  |
| T0506-D1 | 137 | 2arza | 92.07 | 1.48 | 23.1 |
| T0506-D2 | 78  | 2arza | 88.29 | 2.10 | 22.1 |
| T0507-D1 | 124 | 2pidB | 70.71 | 2.12 | 9.5  |
| T0508-D1 | 174 | 1eizA | 91.97 | 1.42 | 32.0 |
| T0509-D1 | 209 | 2hnbB | 86.77 | 1.88 | 20.5 |
| T0510-D1 | 151 | 1r2zA | 50.37 | 2.04 | 4.7  |
| T0510-D2 | 68  | 2f5sA | 73.33 | 2.29 | 18.2 |
| T0511-D1 | 249 | 1vl8B | 82.09 | 1.70 | 25.0 |
| T0512-D1 | 320 | 110qB | 65.73 | 2.12 | 18.8 |
| T0513-D1 | 208 | 2fkbA | 64.85 | 2.06 | 14.7 |
| T0514-D1 | 144 | 2zf8A | 47.10 | 2.70 | 8.0  |

---
