# Supplementary material for: (PS)2-v2: template-based protein structure prediction server
Source: PubMed Central journal article supplement (PMC2775752; doi:10.1186/1471-2105-10-366), 2009-10-31
Supplement: 1471-2105-10-366-S4.pdf [file 1471-2105-10-366-S4.pdf]

**Table S2. The GDT\_TS scores of the (PS)<sup>2</sup>-original, (PS)<sup>2</sup>-CASP8 and (PS)<sup>2</sup>-v2 servers on 154 TBM targets**

| CASP8 targets         | (PS) <sup>2</sup> -original [1] |        | (PS) <sup>2</sup> -CASP8 [2] |        | (PS) <sup>2</sup> -v2 (This study) |                   | Different GDT_TS between (PS) <sup>2</sup> -CASP8 and (PS) <sup>2</sup> -v2 |      |
|-----------------------|---------------------------------|--------|------------------------------|--------|------------------------------------|-------------------|-----------------------------------------------------------------------------|------|
|                       | Templates                       | GDT_TS | Templates                    | GDT_TS | Templates                          | $w^{s2a2}$ GDT_TS |                                                                             |      |
| T0388-D1              | 2p31A                           | 90.5   | 2p31A                        | 90.6   | 2p31A                              | 0.64              | 90.6                                                                        | 0    |
| T0389-D1              | 1hzmA                           | 36.6   | 2oucA                        | 67.2   | 2oucA                              | 0.64              | 67.2                                                                        | 0    |
| T0390-D1              | 1shxA                           | 90.5   | 1shxA                        | 90.3   | 1shxA                              | 0.64              | 90.3                                                                        | 0    |
| T0391-D1              | 1z01A                           | 61.5   | 2e4qA                        | 57.4   | 2e4qA                              | 0.64              | 57.4                                                                        | 0    |
| T0392-D1              | 1vaeA                           | 87.5   | 1vaeA                        | 87.5   | 1vaeA                              | 0.64              | 87.5                                                                        | 0    |
| T0393-D1              | 1teaA                           | 63.2   | 2h78A                        | 59.3   | 2h78A                              | 0.64              | 59.3                                                                        | 0    |
| T0393-D2              | 1teaA                           | 35.1   | 2h78A                        | 31.6   | 2h78A                              | 0.64              | 31.6                                                                        | 0    |
| T0394-D1              | 1xq9A                           | 51.1   | 1xq9A                        | 51.7   | 1xq9A                              | 0.64              | 51.7                                                                        | 0    |
| T0395-D1              | 2oq2C                           | 36.4   | 1zunA                        | 49.1   | 1zunA                              | 0.64              | 49.1                                                                        | 0    |
| T0396-D1              | 1oqcA                           | 86.0   | 1oqcA                        | 86.0   | 1oqcA                              | 0.64              | 86.0                                                                        | 0    |
| T0397-D2              | 1w9iA                           | 18.0   | 1wltA                        | 26.1   | 1wltA                              | 0.64              | 26.1                                                                        | 0    |
| T0398-D1              | 2rirE                           | 94.1   | 2rirE                        | 94.1   | 2rirE                              | 0.64              | 94.1                                                                        | 0    |
| T0398-D2              | 2rirE                           | 98.6   | 2rirE                        | 98.6   | 2rirE                              | 0.64              | 98.6                                                                        | 0    |
| T0399-D1              | 2g2uB                           | 40.4   | 2g2uB                        | 42.6   | 2g2uB                              | 0.64              | 42.6                                                                        | 0    |
| T0400-D1              | 2q7bA                           | 85.2   | 2q7bA                        | 90.5   | 2q7bA                              | 0.64              | 90.5                                                                        | 0    |
| T0401-D1              | 2icgA                           | 54.5   | 2prvA                        | 61.8   | 2prvA                              | 0.64              | 61.8                                                                        | 0    |
| T0402-D1              | 2i02A                           | 82.2   | 2i02A                        | 81.4   | 2i02A                              | 0.64              | 81.4                                                                        | 0    |
| T0404-D1              | 2cz4A                           | 93.0   | 2cz4A                        | 92.7   | 2cz4A                              | 0.64              | 92.7                                                                        | 0    |
| T0406-D1              | 2f22B                           | 51.0   | 2hkvA                        | 62.9   | 2hkvA                              | 0.64              | 62.9                                                                        | 0    |
| T0407-D1              | 2hnhA                           | 34.1   | 2anuA                        | 62.6   | 2anuA                              | 0.64              | 62.6                                                                        | 0    |
| T0407-D2 <sup>b</sup> | 2hnhA                           | 16.5   | 2anuA                        | 0      | 2iakB                              | 0.64              | 17.8                                                                        | 17.8 |
| T0408-D1 <sup>c</sup> | 2af7D                           | 79.8   | 1vkeE                        | 63.5   | 2af7D                              | 0.64              | 75.3                                                                        | 11.8 |
| T0409-D1 <sup>c</sup> | 1wv3A                           | 29.4   | 1bkbA                        | 75.4   | 1bkbA                              | 0.4               | 77.8                                                                        | 2.4  |
| T0411-D1              | 1uarA                           | 66.1   | 2hhgA                        | 74.4   | 2hhgA                              | 0.64              | 74.4                                                                        | 0    |
| T0412-D1              | 1mkmB                           | 61.2   | 2o99C                        | 73.3   | 2o99C                              | 0.64              | 73.3                                                                        | 0    |
| T0413-D1              | 2ecfA                           | 32.9   | 1jffA                        | 35.7   | 1jffA                              | 0.64              | 35.7                                                                        | 0    |
| T0414-D1              | 1fi2A                           | 44.7   | 2pa7A                        | 50.0   | 2pa7A                              | 0.64              | 50.0                                                                        | 0    |
| T0415-D1 <sup>c</sup> | 3bs1A                           | 72.9   | 3bs1A                        | 74.5   | 3bs1A                              | 0.4               | 75.0                                                                        | 0.5  |
| T0416-D1              | 2qgnA                           | 69.0   | 2qgnA                        | 86.0   | 2qgnA                              | 0.64              | 86.0                                                                        | 0    |
| T0417-D1              | 2j8mA                           | 55.4   | 2cntA                        | 65.9   | 2cntA                              | 0.64              | 65.9                                                                        | 0    |
| T0418-D1 <sup>c</sup> | 2nyvA                           | 85.6   | 2pibA                        | 82.3   | 2hi0A                              | 0.64              | 86.0                                                                        | 3.7  |
| T0418-D2 <sup>c</sup> | 2nyvA                           | 76.1   | 2pibA                        | 69.6   | 2hi0A                              | 0.64              | 72.8                                                                        | 3.2  |
| T0419-D1              | 4tmkA                           | 26.5   | 2jaqA                        | 38.1   | 2jaqA                              | 0.64              | 38.1                                                                        | 0    |
| T0419-D2 <sup>b</sup> | 4tmkA                           | 5.0    | 2jaqA                        | 0      | 2jaqA                              | 0.64              | 36.6                                                                        | 36.6 |
| T0420-D1 <sup>c</sup> | 2v0hA                           | 53.6   | 1e5kA                        | 56.8   | 1fxjA                              | 0.64              | 66.4                                                                        | 9.6  |
| T0421-D1              | 4tmkA                           | 25.0   | 2jaqA                        | 40.4   | 2jaqA                              | 0.64              | 40.4                                                                        | 0    |
| T0422-D1              | 3b9pA                           | 79.6   | 3b9pA                        | 78.3   | 3b9pA                              | 0.64              | 78.3                                                                        | 0    |
| T0422-D2              | 3b9pA                           | 86.9   | 3b9pA                        | 86.9   | 3b9pA                              | 0.64              | 86.9                                                                        | 0    |
| T0423-D1              | 2otmB                           | 91.5   | 2otmB                        | 91.2   | 2otmB                              | 0.64              | 91.2                                                                        | 0    |
| T0424-D1              | 1wruA                           | 76.1   | 3cddD                        | 78.0   | 3cddD                              | 0.64              | 78.0                                                                        | 0    |
| T0424-D2              | 1wruA                           | 75.9   | 3cddD                        | 78.6   | 3cddD                              | 0.64              | 78.6                                                                        | 0    |
| T0424-D3              | 1wruA                           | 78.5   | 3cddD                        | 79.8   | 3cddD                              | 0.64              | 79.8                                                                        | 0    |
| T0425-D1              | 1jwqA                           | 60.3   | 1jwqA                        | 64.0   | 1jwqA                              | 0.64              | 64.0                                                                        | 0    |
| T0426-D1              | 1lugA                           | 94.8   | 2nmxA                        | 96.4   | 2nmxA                              | 0.64              | 96.4                                                                        | 0    |
| T0427-D1              | 1kb9A                           | 54.7   | 1hr6D                        | 69.5   | 1hr6D                              | 0.64              | 69.5                                                                        | 0    |
| T0427-D2              | 1kb9A                           | 56.9   | 1hr6D                        | 63.2   | 1hr6D                              | 0.64              | 63.2                                                                        | 0    |
| T0428-D1              | 1xq9A                           | 95.6   | 1xq9A                        | 95.6   | 1xq9A                              | 0.64              | 95.6                                                                        | 0    |
| T0429-D1              | 2hfvA                           | 15.0   | 1oh4A                        | 23.6   | 1oh4A                              | 0.64              | 23.6                                                                        | 0    |
| T0429-D2              | 2hfvA                           | 21.3   | 1oh4A                        | 28.3   | 1oh4A                              | 0.64              | 28.3                                                                        | 0    |
| T0430-D1 <sup>a</sup> | 1unlA                           | 38.2   | 1unlA                        | 27.7   | 2r3iA                              | 0.64              | 36.4                                                                        | 8.7  |
| T0430-D2 <sup>a</sup> | 1unlA                           | 35.3   | 1unlA                        | 41.1   | 2r3iA                              | 0.64              | 35.1                                                                        | -6   |
| T0431-D1              | 3b6hB                           | 79.0   | 3b6hB                        | 73.0   | 3b6hB                              | 0.64              | 73.0                                                                        | 0    |
| T0431-D2              | 3b6hB                           | 80.0   | 3b6hB                        | 75.2   | 3b6hB                              | 0.64              | 75.2                                                                        | 0    |
| T0432-D1              | 2dkwA                           | 81.3   | 2dkwA                        | 81.0   | 2dkwA                              | 0.64              | 81.0                                                                        | 0    |

|                         |       |      |       |      |       |      |      |      |
|-------------------------|-------|------|-------|------|-------|------|------|------|
| T0433-D1                | 1q7bA | 69.7 | 1q7bA | 76.8 | 1q7bA | 0.64 | 76.8 | 0    |
| T0434-D1 <sup>a</sup>   | 2o8jB | 52.2 | 2rfiA | 58.4 | 2qpwA | 0.64 | 63.4 | 5    |
| T0435-D1                | 2qpwA | 80.3 | 2qpwA | 79.7 | 2qpwA | 0.64 | 79.7 | 0    |
| T0436-D1                | 1x0mA | 60.4 | 2dtvA | 59.3 | 2dtvA | 0.64 | 59.3 | 0    |
| T0437-D1                | 2jz5A | 84.6 | 2jz5A | 84.9 | 2jz5A | 0.64 | 84.9 | 0    |
| T0438-D1                | 2oasA | 86.0 | 2oasA | 87.8 | 2oasA | 0.64 | 87.8 | 0    |
| T0438-D2                | 2oasA | 93.0 | 2oasA | 92.7 | 2oasA | 0.64 | 92.7 | 0    |
| T0440-D1                | 2yx0B | 69.5 | 2yx0B | 71.6 | 2yx0B | 0.64 | 71.6 | 0    |
| T0441-D1                | 1jftA | 73.6 | 1jftA | 73.4 | 1jftA | 0.64 | 73.4 | 0    |
| T0441-D2                | 1jftA | 80.8 | 1jftA | 80.5 | 1jftA | 0.64 | 80.5 | 0    |
| T0442-D1                | 2pifB | 93.8 | 2pifB | 93.8 | 2pifB | 0.64 | 93.8 | 0    |
| T0442-D2                | 2pifB | 95.9 | 2pifB | 95.9 | 2pifB | 0.64 | 95.9 | 0    |
| T0443-D1                | 1ps1A | 36.4 | 1tffA | 33.0 | 1tffA | 0.64 | 33.0 | 0    |
| T0443-D3 <sup>b</sup>   | 1ps1A | 30.3 | 1tffA | 0    | 1p0zA | 0.64 | 42.4 | 42.4 |
| T0444-D1                | 1h0oA | 88.1 | 1h0oA | 87.5 | 1h0oA | 0.64 | 87.5 | 0    |
| T0445-D1                | 2hf2B | 85.8 | 2hf2B | 87.9 | 2hf2B | 0.64 | 87.9 | 0    |
| T0445-D2                | 2hf2B | 62.2 | 2hf2B | 66.6 | 2hf2B | 0.64 | 66.6 | 0    |
| T0446-D1                | 3b77A | 67.5 | 3b77A | 71.9 | 3b77A | 0.64 | 71.9 | 0    |
| T0446-D2                | 3b77A | 68.5 | 3b77A | 67.0 | 3b77A | 0.64 | 67.0 | 0    |
| T0447-D1                | 1eg7A | 88.8 | 1eg7A | 88.6 | 1eg7A | 0.64 | 88.6 | 0    |
| T0448-D1                | 3bzwA | 75.4 | 3bzwA | 76.2 | 3bzwA | 0.64 | 76.2 | 0    |
| T0449-D1 <sup>a,c</sup> | 1nsxB | 42.6 | 1lurA | 54.5 | 1snzA | 0.8  | 55.2 | 0.7  |
| T0450-D1                | 2rghA | 84.0 | 2rghA | 79.3 | 2rghA | 0.64 | 79.3 | 0    |
| T0451-D1 <sup>c</sup>   | 1s5aB | 65.2 | 1s5aB | 67.1 | 1tuhA | 0.64 | 68.9 | 1.8  |
| T0452-D1                | 2ejwA | 65.2 | 2ejwA | 77.7 | 2ejwA | 0.64 | 77.7 | 0    |
| T0452-D2                | 2ejwA | 88.3 | 2ejwA | 89.6 | 2ejwA | 0.64 | 89.6 | 0    |
| T0453-D1                | 2plsA | 83.4 | 2plsA | 83.4 | 2plsA | 0.64 | 83.4 | 0    |
| T0454-D1                | 2iaiA | 82.2 | 1pb6A | 91.8 | 1pb6A | 0.64 | 91.8 | 0    |
| T0454-D2                | 2iaiA | 64.1 | 1pb6A | 59.3 | 1pb6A | 0.64 | 59.3 | 0    |
| T0455-D1                | 2ooiB | 78.6 | 3bwgB | 86.3 | 3bwgB | 0.64 | 86.3 | 0    |
| T0456-D1                | 2qg5A | 75.9 | 2qg5A | 75.6 | 2qg5A | 0.64 | 75.6 | 0    |
| T0456-D2                | 2qg5A | 78.7 | 2qg5A | 79.4 | 2qg5A | 0.64 | 79.4 | 0    |
| T0457-D1 <sup>c</sup>   | 1ir6A | 41.9 | 1k20A | 58.0 | 1k20A | 0.8  | 60.6 | 2.6  |
| T0457-D2 <sup>c</sup>   | 1ir6A | 37.9 | 1k20A | 37.5 | 1k20A | 0.8  | 45.8 | 8.3  |
| T0458-D1                | 2okaA | 96.1 | 2fa8B | 95.8 | 2fa8B | 0.64 | 95.8 | 0    |
| T0459-D1                | 2f2eA | 75.3 | 1z7uA | 76.7 | 1z7uA | 0.64 | 76.7 | 0    |
| T0460-D1 <sup>a</sup>   | 2h2wA | -    | 2pr5A | 23.1 | 1q33A | 0.64 | 32.2 | 9.1  |
| T0461-D1                | 2nx8A | 83.1 | 2nx8A | 84.7 | 2nx8A | 0.64 | 84.7 | 0    |
| T0462-D1                | 2gcxA | 72.1 | 2gcxA | 71.1 | 2gcxA | 0.64 | 71.1 | 0    |
| T0462-D2                | 2gcxA | 75.3 | 2gcxA | 77.4 | 2gcxA | 0.64 | 77.4 | 0    |
| T0463-D1 <sup>c</sup>   | 2c29F | 60.3 | 1r6dA | 56.9 | 1r6dA | 0.4  | 58.6 | 1.7  |
| T0464-D1                | 2jnyA | 42.0 | 2pk7A | 46.4 | 2pk7A | 0.64 | 46.4 | 0    |
| T0466-D1                | 1ogoX | 21.2 | 1xq4A | 32.3 | 1xq4A | 0.64 | 32.3 | 0    |
| T0468-D1 <sup>c</sup>   | 1gsoA | 27.0 | 1bbpA | 26.6 | 1bbpA | 0.4  | 28.3 | 1.7  |
| T0469-D1                | 2fi0A | 75.8 | 2fi0A | 75.8 | 2fi0A | 0.64 | 75.8 | 0    |
| T0470-D1                | 2pjQB | 79.3 | 2qgsA | 85.6 | 2qgsA | 0.64 | 85.6 | 0    |
| T0470-D2                | 2pjQB | 87.7 | 2qgsA | 94.5 | 2qgsA | 0.64 | 94.5 | 0    |
| T0471-D1 <sup>c</sup>   | 2absA | 24.4 | 2nwrA | 32.7 | 1nv8A | 0.64 | 61.7 | 29   |
| T0472-D1                | 3bidE | 73.7 | 3bidE | 74.6 | 3bidE | 0.64 | 74.6 | 0    |
| T0472-D2                | 3bidE | 86.7 | 3bidE | 86.7 | 3bidE | 0.64 | 86.7 | 0    |
| T0473-D1 <sup>c</sup>   | 2fi0A | 75.8 | 2fi0A | 75.4 | 2fi0A | 0.8  | 74.2 | -1.2 |
| T0474-D1 <sup>a</sup>   | 1vr6A | 37.2 | 1fadA | 51.2 | 2cpgB | 0.64 | 78.7 | 27.5 |
| T0475-D1 <sup>c</sup>   | 1ohpA | 75.4 | 1ohpA | 75.6 | 1ohpA | 0.4  | 79.2 | 3.6  |
| T0476-D1 <sup>c</sup>   | 2gx9A | 23.3 | 2c5kT | 22.7 | 2c5kT | 0.8  | 23.9 | 1.2  |
| T0477-D1 <sup>c</sup>   | 2db3A | 75.1 | 2db3A | 76.5 | 2db3A | 0.4  | 76.0 | -0.5 |
| T0478-D1 <sup>a,c</sup> | 1toaA | 26.8 | 2v0oA | 35.1 | 1h6gA | 0.8  | 42.1 | 7    |
| T0478-D2 <sup>a,c</sup> | 1toaA | 9.6  | 2v0oA | 29.8 | 1h6gA | 0.8  | 38.1 | 8.3  |
| T0479-D1 <sup>c</sup>   | 1zkiA | 89.1 | 1zkiA | 88.9 | 1zkiA | 0.4  | 90.4 | 1.5  |
| T0480-D1                | 3cngC | 60.8 | 2zkr2 | 59.2 | 2zkr2 | 0.64 | 59.2 | 0    |
| T0481-D1                | 2f22B | 64.1 | 2hkvA | 64.1 | 2hkvA | 0.64 | 64.1 | 0    |
| T0483-D1                | 2qnjB | 64.1 | 2qnjB | 62.7 | 2qnjB | 0.64 | 62.7 | 0    |
| T0485-D1                | 3busA | 59.3 | 1im8A | 58.9 | 1im8A | 0.64 | 58.9 | 0    |

|                       |       |        |       |        |       |      |         |      |
|-----------------------|-------|--------|-------|--------|-------|------|---------|------|
| T0486-D1              | 2hw5A | 80.0   | 2pbpA | 80.4   | 2pbpA | 0.64 | 80.4    | 0    |
| T0487-D1              | 1yvuA | 59.7   | 2f8sA | 62.9   | 2f8sA | 0.64 | 62.9    | 0    |
| T0487-D2              | 1yvuA | 45.3   | 2f8sA | 35.3   | 2f8sA | 0.64 | 35.3    | 0    |
| T0487-D3              | 1yvuA | 47.5   | 2f8sA | 65.1   | 2f8sA | 0.64 | 65.1    | 0    |
| T0487-D4              | 1yvuA | 50.3   | 2f8sA | 37.4   | 2f8sA | 0.64 | 37.4    | 0    |
| T0487-D5              | 1yvuA | 51.0   | 2f8sA | 51.9   | 2f8sA | 0.64 | 51.9    | 0    |
| T0488-D1              | 2he2A | 84.3   | 2qg1A | 92.7   | 2qg1A | 0.64 | 92.7    | 0    |
| T0489-D1              | 1ei9A | 11.3   | 1jq5A | 13.6   | 1jq5A | 0.64 | 13.6    | 0    |
| T0490-D1              | 2qcuB | 60.6   | 1y56B | 68.8   | 1y56B | 0.64 | 68.8    | 0    |
| T0491-D1 <sup>c</sup> | 1wocC | 82.6   | 1wocC | 81.8   | 1wocC | 0.4  | 82.8    | 1    |
| T0492-D1              | 2gcxA | 71.0   | 2h3jA | 71.7   | 2h3jA | 0.64 | 71.7    | 0    |
| T0493-D1              | 2is6A | 36.2   | 1pjrA | 74.0   | 1pjrA | 0.64 | 74.0    | 0    |
| T0494-D1              | 2eu9A | 74.1   | 2eu9A | 72.5   | 2eu9A | 0.64 | 72.5    | 0    |
| T0495-D1              | 1y0kA | 11.2   | 1gefA | 37.6   | 1gefA | 0.64 | 37.6    | 0    |
| T0496-D2 <sup>c</sup> | 1pp9A | 55.0   | 2pbrA | 37.2   | 1dd5A | 0.64 | 71.1    | 33.9 |
| T0497-D1              | 2qeaA | 75.2   | 2i02A | 74.6   | 2i02A | 0.64 | 74.6    | 0    |
| T0498-D1              | 1pgxA | 37.8   | 2qmtA | 36.7   | 2qmtA | 0.64 | 36.7    | 0    |
| T0499-D1              | 1pgxA | 83.0   | 1pgxA | 83.0   | 1pgxA | 0.64 | 83.0    | 0    |
| T0501-D1              | 1i74A | 56.9   | 1k20A | 58.9   | 1k20A | 0.64 | 58.9    | 0    |
| T0501-D2              | 1i74A | 31.9   | 1k20A | 55.4   | 1k20A | 0.64 | 55.4    | 0    |
| T0502-D1              | 1ynxA | 68.0   | 1o7iA | 73.1   | 1o7iA | 0.64 | 73.1    | 0    |
| T0503-D1              | 2h6bA | 54.9   | 1hw5A | 66.0   | 1hw5A | 0.64 | 66.0    | 0    |
| T0504-D1 <sup>a</sup> | 2g3rA | 17.3   | 2ns2A | 44.4   | 2g3rA | 0.64 | 74.2    | 29.8 |
| T0504-D2 <sup>a</sup> | 2g3rA | 48.9   | 2ns2A | 25.6   | 2g3rA | 0.64 | 32.2    | 6.6  |
| T0504-D3 <sup>b</sup> | 2g3rA | 56.1   | 2ns2A | 41.0   | 2eqmA | 0.64 | 80.7    | 39.7 |
| T0505-D1              | 1rkqA | 89.0   | 1rkqA | 89.5   | 1rkqA | 0.64 | 89.5    | 0    |
| T0505-D2              | 1rkqA | 61.3   | 1rkqA | 63.0   | 1rkqA | 0.64 | 63.0    | 0    |
| T0506-D1              | 2arza | 84.5   | 2arza | 80.8   | 2arza | 0.64 | 80.8    | 0    |
| T0506-D2              | 2arza | 77.2   | 2arza | 79.8   | 2arza | 0.64 | 79.8    | 0    |
| T0507-D1 <sup>c</sup> | 1od6A | 33.7   | 1cozA | 59.9   | 1cozA | 0.4  | 62.1    | 2.2  |
| T0508-D1              | 1ej0A | 84.2   | 1ej0A | 84.5   | 1ej0A | 0.64 | 84.5    | 0    |
| T0509-D1              | 2avdA | 72.7   | 2hnbB | 76.9   | 2hnbB | 0.64 | 76.9    | 0    |
| T0510-D1 <sup>c</sup> | 1tdzA | 14.7   | 1tdzA | 16.6   | 1tdzA | 0.8  | 24.5    | 7.9  |
| T0510-D2 <sup>c</sup> | 1tdzA | 48.5   | 1tdzA | 51.8   | 1tdzA | 0.8  | 67.3    | 15.5 |
| T0511-D1              | 2uvdA | 71.4   | 2uvdA | 70.0   | 2uvdA | 0.64 | 70.0    | 0    |
| T0512-D1              | 1l0qA | 55.6   | 1l0qA | 62.0   | 1l0qA | 0.64 | 62.0    | 0    |
| T0513-D1              | 1vk6A | 30.2   | 2fkbC | 48.7   | 2fkbC | 0.64 | 48.7    | 0    |
| T0514-D1 <sup>c</sup> | 1t1gA | 12.3   | 1ogaD | 14.8   | 1ikpA | 0.64 | 17.5    | 2.7  |
| Sum                   |       | 9447.5 |       | 9954.4 |       |      | 10331.4 |      |

<sup>a</sup> Template search method contributes for this difference between (PS)<sup>2</sup>-CASP8 and (PS)<sup>2</sup>-v2.

<sup>b</sup> Multiple-template method contributes for this difference between (PS)<sup>2</sup>-CASP8 and (PS)<sup>2</sup>-v2.

<sup>c</sup> Multiple-model method contributes for this difference between (PS)<sup>2</sup>-CASP8 and (PS)<sup>2</sup>-v2.

## References

1. Chen CC, Hwang JK, Yang JM: **(PS)<sup>2</sup>: protein structure prediction server**. *Nucleic Acids Res* 2006, **34**:W152-W157.
2. Chen CC, Yang JM, Hwang JK: **(PS)<sup>2</sup>: protein structure prediction server**. *Eighth Community Wide Experiment on the Critical Assessment of Techniques for Protein Structure Prediction* 2008:87-88.
