# Supplementary material for: (PS)2-v2: template-based protein structure prediction server
Source: PubMed Central journal article supplement (PMC2775752; doi:10.1186/1471-2105-10-366), 2009-10-31

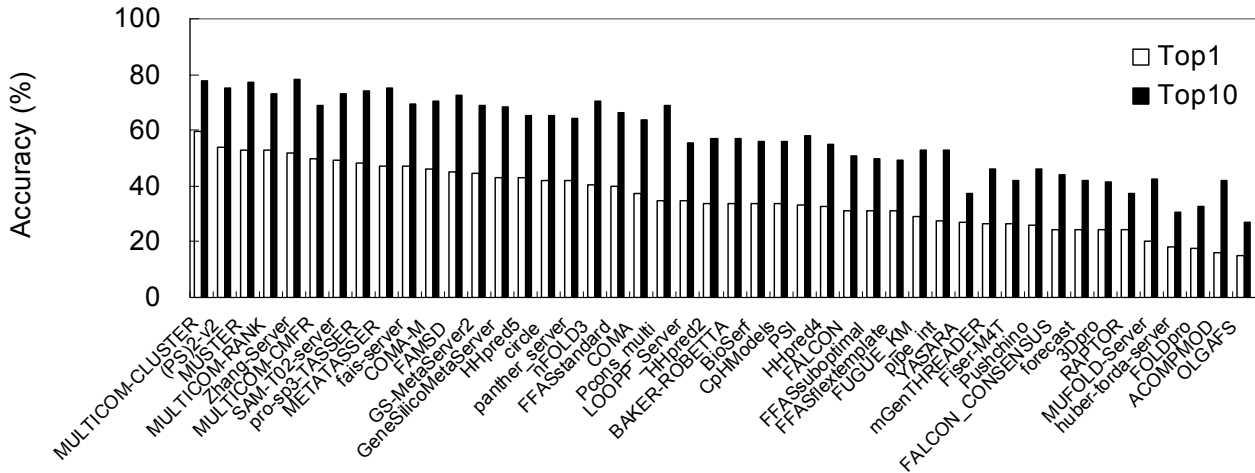

Supplement: 1471-2105-10-366-S5.pdf [file 1471-2105-10-366-S5.pdf]
