# Supplementary material for: (PS)2-v2: template-based protein structure prediction server
Source: PubMed Central journal article supplement (PMC2775752; doi:10.1186/1471-2105-10-366), 2009-10-31
Supplement: 1471-2105-10-366-S7.pdf [file 1471-2105-10-366-S7.pdf]

**Table S3. Comparison of the (PS)<sup>2</sup>-v2 server and top five servers in CASP8**

| LGA_S <sup>a</sup> /<br>Methods | Easy<br>> 90% ( <i>n</i> <sup>b</sup> =52) |                              | Medium<br>70% ~ 90% ( <i>n</i> =62) |                 | Hard<br>< 70% ( <i>n</i> =40) |                 |
|---------------------------------|--------------------------------------------|------------------------------|-------------------------------------|-----------------|-------------------------------|-----------------|
|                                 | Average <sup>c</sup>                       | <i>p</i> -value <sup>d</sup> | Average                             | <i>p</i> -value | Average                       | <i>p</i> -value |
| Average of the<br>top 5 servers | 84.51                                      | -                            | 68.82                               | -               | 47.14                         | -               |
| (PS) <sup>2</sup> -v2           | 84.11                                      | 0.6183                       | 67.57                               | 0.2113          | 44.21                         | 0.0049          |

<sup>a</sup> LGA\_S score between target and the best template in CASP8.

<sup>b</sup> *n* is the number of targets.

<sup>c</sup> Average of the GDT\_TS score.

<sup>d</sup> The *p*-value of the paired Student's t-test between (PS)<sup>2</sup>-v2 and top-ranking 5 servers.
