# Supplementary material for: (PS)2-v2: template-based protein structure prediction server
Source: PubMed Central journal article supplement (PMC2775752; doi:10.1186/1471-2105-10-366), 2009-10-31
Supplement: 1471-2105-10-366-S8.pdf [file 1471-2105-10-366-S8.pdf]

**Table S4. (PS)<sup>2</sup>-v2 results for using single-model and multiple-model strategies on 154 targets in CASP8 based on GDT\_TS scores**

|                       | Number of targets | Number of targets with the same GDT_TS <sup>a</sup> | Number of targets improving GDT_TS by multiple models <sup>b</sup> | Number of targets decreasing GDT_TS by multiple models <sup>c</sup> | Sum of improving GDT_TS by multiple models | p-value |
|-----------------------|-------------------|-----------------------------------------------------|--------------------------------------------------------------------|---------------------------------------------------------------------|--------------------------------------------|---------|
| SI <sup>d</sup> ≥ 30% | 40                | 39                                                  | 0                                                                  | 1                                                                   | -0.4                                       | 0.3235  |
| 30% > SI ≥ 20%        | 47                | 36                                                  | 9                                                                  | 2                                                                   | 16.3                                       | 0.0231  |
| SI < 20%              | 67                | 52                                                  | 14                                                                 | 1                                                                   | 129.4                                      | 0.0045  |
| Total                 | 154               | 127                                                 | 23                                                                 | 4                                                                   | 145.3                                      | 0.0018  |

<sup>a</sup> The GDT\_TS of (PS)<sup>2</sup>-v2 using multiple-model method equals the one of (PS)<sup>2</sup>-v2 using single-model method.

<sup>b</sup> The number of targets whose GDT\_TS scores are improved by using the multiple-model method

<sup>c</sup> The number of targets whose GDT\_TS scores are decreased by using the multiple-model method.

<sup>d</sup> Sequence identity.
