# Supplementary material for: (PS)2-v2: template-based protein structure prediction server
Source: BMC Bioinformatics. 2009 Oct 31;10:366. doi: 10.1186/1471-2105-10-366 (PMC2775752; doi:10.1186/1471-2105-10-366)
Supplement: Additional file 2 — Figure S1. The S2A2 matrix. [file 1471-2105-10-366-S2.pdf]

| Sig | A   | G   | V   | R   | K   | H   | D   | E   | C   | N   | Q   | I   | L   | M   | P   | S   | T   | F   | W   | Y   | A   | G   | V   | R   | K   | H   | D   | E   | C   | N   | Q   | I   | L   | M   | P   | S   | T   | F   | W   | Y   |     |
|-----|-----|-----|-----|-----|-----|-----|-----|-----|-----|-----|-----|-----|-----|-----|-----|-----|-----|-----|-----|-----|-----|-----|-----|-----|-----|-----|-----|-----|-----|-----|-----|-----|-----|-----|-----|-----|-----|-----|-----|-----|-----|
| A   | 2.5 | 1.7 | 1.4 | 0.5 | 0.9 | 0.7 | 0.4 | 0.5 | 0.6 | 0.5 | 0.7 | 0.4 | 0.5 | 0.6 | 0.5 | 0.7 | 0.4 | 0.5 | 0.6 | 0.5 | 0.7 | 0.4 | 0.5 | 0.6 | 0.5 | 0.7 | 0.4 | 0.5 | 0.6 | 0.5 | 0.7 | 0.4 | 0.5 | 0.6 | 0.5 | 0.7 | 0.4 | 0.5 | 0.6 | 0.5 |     |
| G   | 1.7 | 4.4 | 0.5 | 0.6 | 0.5 | 0.7 | 0.4 | 0.5 | 0.6 | 0.5 | 0.7 | 0.4 | 0.5 | 0.6 | 0.5 | 0.7 | 0.4 | 0.5 | 0.6 | 0.5 | 0.7 | 0.4 | 0.5 | 0.6 | 0.5 | 0.7 | 0.4 | 0.5 | 0.6 | 0.5 | 0.7 | 0.4 | 0.5 | 0.6 | 0.5 | 0.7 | 0.4 | 0.5 | 0.6 | 0.5 |     |
| V   | 0.5 | 0.6 | 2.8 | 0.3 | 0.3 | 0.3 | 0.0 | 0.1 | 0.3 | 0.1 | 0.2 | 0.4 | 0.3 | 0.1 | 0.1 | 1.6 | 1   | 0.2 | 0.1 | 0.1 | 0.1 | 0.1 | 0.1 | 0.1 | 0.1 | 0.1 | 0.1 | 0.1 | 0.1 | 0.1 | 0.1 | 0.1 | 0.1 | 0.1 | 0.1 | 0.1 | 0.1 | 0.1 | 0.1 | 0.1 |     |
| R   | 0.4 | 0.5 | 0.3 | 3.4 | 2.3 | 1.5 | 1.1 | 1.4 | 0.6 | 1.5 | 1.0 | 0.3 | 0.3 | 0.6 | 0.8 | 0.9 | 0.3 | 0.6 | 0.8 | 0.9 | 0.3 | 0.6 | 0.8 | 0.9 | 0.3 | 0.6 | 0.8 | 0.9 | 0.3 | 0.6 | 0.8 | 0.9 | 0.3 | 0.6 | 0.8 | 0.9 | 0.3 | 0.6 | 0.8 | 0.9 |     |
| K   | 0.9 | 0.5 | 0.3 | 2.3 | 2.9 | 1.1 | 1.1 | 1.7 | 0.5 | 1.5 | 1.0 | 0.2 | 0.1 | 0.4 | 0.6 | 1.3 | 1.0 | 0.4 | 0.4 | 0.3 | 0.5 | 0.6 | 0.5 | 0.7 | 0.4 | 0.5 | 0.6 | 0.5 | 0.7 | 0.4 | 0.5 | 0.6 | 0.5 | 0.7 | 0.4 | 0.5 | 0.6 | 0.5 | 0.7 | 0.4 |     |
| H   | 0.7 | 0.7 | 0.3 | 1.5 | 1.1 | 0.5 | 1.0 | 1.1 | 0.7 | 1.5 | 0.5 | 0.2 | 0.9 | 0.2 | 0.8 | 1.1 | 1.0 | 0.6 | 0.8 | 0.9 | 0.3 | 0.6 | 0.8 | 0.9 | 0.3 | 0.6 | 0.8 | 0.9 | 0.3 | 0.6 | 0.8 | 0.9 | 0.3 | 0.6 | 0.8 | 0.9 | 0.3 | 0.6 | 0.8 | 0.9 |     |
| D   | 0.4 | 0.3 | 0.0 | 1.1 | 1.5 | 1.0 | 0.6 | 0.3 | 0.1 | 0.3 | 0.1 | 0.9 | 1.7 | 0.5 | 0.6 | 0.5 | 1.3 | 1.2 | 0.6 | 0.2 | 0.1 | 0.1 | 0.1 | 0.1 | 0.1 | 0.1 | 0.1 | 0.1 | 0.1 | 0.1 | 0.1 | 0.1 | 0.1 | 0.1 | 0.1 | 0.1 | 0.1 | 0.1 | 0.1 |     |     |
| E   | 0.8 | 0.4 | 0.1 | 1.4 | 1.7 | 1.1 | 2.1 | 2.3 | 0.5 | 1.3 | 2.0 | 0.4 | 0.2 | 0.3 | 1.0 | 1.1 | 1.4 | 0.4 | 0.3 | 0.6 | 0.8 | 0.9 | 0.3 | 0.6 | 0.8 | 0.9 | 0.3 | 0.6 | 0.8 | 0.9 | 0.3 | 0.6 | 0.8 | 0.9 | 0.3 | 0.6 | 0.8 | 0.9 | 0.3 | 0.6 |     |
| C   | 1.6 | 1.3 | 1.3 | 0.4 | 0.5 | 0.3 | 0.9 | 0.5 | 0.5 | 0.7 | 0.2 | 0.9 | 0.3 | 0.9 | 1.2 | 1.1 | 0.6 | 0.9 | 0.8 | 0.9 | 0.3 | 0.6 | 0.8 | 0.9 | 0.3 | 0.6 | 0.8 | 0.9 | 0.3 | 0.6 | 0.8 | 0.9 | 0.3 | 0.6 | 0.8 | 0.9 | 0.3 | 0.6 | 0.8 | 0.9 |     |
| N   | 0.8 | 0.9 | 0.1 | 1.3 | 1.5 | 1.7 | 1.9 | 1.7 | 0.7 | 1.8 | 1.5 | 0.7 | 1.8 | 1.5 | 0.7 | 1.8 | 1.5 | 0.7 | 1.8 | 1.5 | 0.7 | 1.8 | 1.5 | 0.7 | 1.8 | 1.5 | 0.7 | 1.8 | 1.5 | 0.7 | 1.8 | 1.5 | 0.7 | 1.8 | 1.5 | 0.7 | 1.8 | 1.5 | 0.7 | 1.8 |     |
| Q   | 1.0 | 0.6 | 0.2 | 1.5 | 1.0 | 1.5 | 1.7 | 2.0 | 0.2 | 1.6 | 1.6 | 0.1 | 0.2 | 0.8 | 0.7 | 1.2 | 1.3 | 0.2 | 0.2 | 0.5 | 0.5 | 0.6 | 0.5 | 0.7 | 0.4 | 0.5 | 0.6 | 0.5 | 0.7 | 0.4 | 0.5 | 0.6 | 0.5 | 0.7 | 0.4 | 0.5 | 0.6 | 0.5 | 0.7 | 0.4 |     |
| I   | 0.9 | 0.4 | 0.4 | 0.3 | 0.2 | 0.5 | 0.5 | 0.4 | 0.9 | 0.3 | 0.1 | 2.3 | 2.3 | 0.1 | 0.3 | 0.8 | 1.6 | 0.7 | 0.8 | 0.5 | 0.6 | 0.5 | 0.7 | 0.4 | 0.5 | 0.6 | 0.5 | 0.7 | 0.4 | 0.5 | 0.6 | 0.5 | 0.7 | 0.4 | 0.5 | 0.6 | 0.5 | 0.7 | 0.4 | 0.5 | 0.6 |
| L   | 0.9 | 0.4 | 0.4 | 0.3 | 0.2 | 0.5 | 0.5 | 0.4 | 0.9 | 0.3 | 0.1 | 2.3 | 2.3 | 0.1 | 0.3 | 0.8 | 1.6 | 0.7 | 0.8 | 0.5 | 0.6 | 0.5 | 0.7 | 0.4 | 0.5 | 0.6 | 0.5 | 0.7 | 0.4 | 0.5 | 0.6 | 0.5 | 0.7 | 0.4 | 0.5 | 0.6 | 0.5 | 0.7 | 0.4 | 0.5 | 0.6 |
| L   | 0.9 | 0.4 | 0.4 | 0.3 | 0.2 | 0.5 | 0.5 | 0.4 | 0.9 | 0.3 | 0.1 | 2.3 | 2.3 | 0.1 | 0.3 | 0.8 | 1.6 | 0.7 | 0.8 | 0.5 | 0.6 | 0.5 | 0.7 | 0.4 | 0.5 | 0.6 | 0.5 | 0.7 | 0.4 | 0.5 | 0.6 | 0.5 | 0.7 | 0.4 | 0.5 | 0.6 | 0.5 | 0.7 | 0.4 | 0.5 | 0.6 |
| L   | 0.9 | 0.4 | 0.4 | 0.3 | 0.2 | 0.5 | 0.5 | 0.4 | 0.9 | 0.3 | 0.1 | 2.3 | 2.3 | 0.1 | 0.3 | 0.8 | 1.6 | 0.7 | 0.8 | 0.5 | 0.6 | 0.5 | 0.7 | 0.4 | 0.5 | 0.6 | 0.5 | 0.7 | 0.4 | 0.5 | 0.6 | 0.5 | 0.7 | 0.4 | 0.5 | 0.6 | 0.5 | 0.7 | 0.4 | 0.5 | 0.6 |
| L   | 0.9 | 0.4 | 0.4 | 0.3 | 0.2 | 0.5 | 0.5 | 0.4 | 0.9 | 0.3 | 0.1 | 2.3 | 2.3 | 0.1 | 0.3 | 0.8 | 1.6 | 0.7 | 0.8 | 0.5 | 0.6 | 0.5 | 0.7 | 0.4 | 0.5 | 0.6 | 0.5 | 0.7 | 0.4 | 0.5 | 0.6 | 0.5 | 0.7 | 0.4 | 0.5 | 0.6 | 0.5 | 0.7 | 0.4 | 0.5 | 0.6 |
| L   | 0.9 | 0.4 | 0.4 | 0.3 | 0.2 | 0.5 | 0.5 | 0.4 | 0.9 | 0.3 | 0.1 | 2.3 | 2.3 | 0.1 | 0.3 | 0.8 | 1.6 | 0.7 | 0.8 | 0.5 | 0.6 | 0.5 | 0.7 | 0.4 | 0.5 | 0.6 | 0.5 | 0.7 | 0.4 | 0.5 | 0.6 | 0.5 | 0.7 | 0.4 | 0.5 | 0.6 | 0.5 | 0.7 | 0.4 | 0.5 | 0.6 |
| L   | 0.9 | 0.4 | 0.4 | 0.3 | 0.2 | 0.5 | 0.5 | 0.4 | 0.9 | 0.3 | 0.1 | 2.3 | 2.3 | 0.1 | 0.3 | 0.8 | 1.6 | 0.7 | 0.8 | 0.5 | 0.6 | 0.5 | 0.7 | 0.4 | 0.5 | 0.6 | 0.5 | 0.7 | 0.4 | 0.5 | 0.6 | 0.5 | 0.7 | 0.4 | 0.5 | 0.6 | 0.5 | 0.7 | 0.4 | 0.5 | 0.6 |
| L   | 0.9 | 0.4 | 0.4 | 0.3 | 0.2 | 0.5 | 0.5 | 0.4 | 0.9 | 0.3 | 0.1 | 2.3 | 2.3 | 0.1 | 0.3 | 0.8 | 1.6 | 0.7 | 0.8 | 0.5 | 0.6 | 0.5 | 0.7 | 0.4 | 0.5 | 0.6 | 0.5 | 0.7 | 0.4 | 0.5 | 0.6 | 0.5 | 0.7 | 0.4 | 0.5 | 0.6 | 0.5 | 0.7 | 0.4 | 0.5 | 0.6 |
| L   | 0.9 | 0.4 | 0.4 | 0.3 | 0.2 | 0.5 | 0.5 | 0.4 | 0.9 | 0.3 | 0.1 | 2.3 | 2.3 | 0.1 | 0.3 | 0.8 | 1.6 | 0.7 | 0.8 | 0.5 | 0.6 | 0.5 | 0.7 | 0.4 | 0.5 | 0.6 | 0.5 | 0.7 | 0.4 | 0.5 | 0.6 | 0.5 | 0.7 | 0.4 | 0.5 | 0.6 | 0.5 | 0.7 | 0.4 | 0.5 | 0.6 |
| L   | 0.9 | 0.4 | 0.4 | 0.3 | 0.2 | 0.5 | 0.5 | 0.4 | 0.9 | 0.3 | 0.1 | 2.3 | 2.3 | 0.1 | 0.3 | 0.8 | 1.6 | 0.7 | 0.8 | 0.5 | 0.6 | 0.5 | 0.7 | 0.4 | 0.5 | 0.6 | 0.5 | 0.7 | 0.4 | 0.5 | 0.6 | 0.5 | 0.7 | 0.4 | 0.5 | 0.6 | 0.5 | 0.7 | 0.4 | 0.5 | 0.6 |
| L   | 0.9 | 0.4 | 0.4 | 0.3 | 0.2 | 0.5 | 0.5 | 0.4 | 0.9 | 0.3 | 0.1 | 2.3 | 2.3 | 0.1 | 0.3 | 0.8 | 1.6 | 0.7 | 0.8 | 0.5 | 0.6 | 0.5 | 0.7 | 0.4 | 0.5 | 0.6 | 0.5 | 0.7 | 0.4 | 0.5 | 0.6 | 0.5 | 0.7 | 0.4 | 0.5 | 0.6 | 0.5 | 0.7 | 0.4 | 0.5 | 0.6 |
| L   | 0.9 | 0.4 | 0.4 | 0.3 | 0.2 | 0.5 | 0.5 | 0.4 | 0.9 | 0.3 | 0.1 | 2.3 | 2.3 | 0.1 | 0.3 | 0.8 | 1.6 | 0.7 | 0.8 | 0.5 | 0.6 | 0.5 | 0.7 | 0.4 | 0.5 | 0.6 | 0.5 | 0.7 | 0.4 | 0.5 | 0.6 | 0.5 | 0.7 | 0.4 | 0.5 | 0.6 | 0.5 | 0.7 | 0.4 | 0.5 | 0.6 |
| L   | 0.9 | 0.4 | 0.4 | 0.3 | 0.2 | 0.5 | 0.5 | 0.4 | 0.9 | 0.3 | 0.1 | 2.3 | 2.3 | 0.1 | 0.3 | 0.8 | 1.6 | 0.7 | 0.8 | 0.5 | 0.6 | 0.5 | 0.7 | 0.4 | 0.5 | 0.6 | 0.5 | 0.7 | 0.4 | 0.5 | 0.6 | 0.5 | 0.7 | 0.4 | 0.5 | 0.6 | 0.5 | 0.7 | 0.4 | 0.5 | 0.6 |
| L   | 0.9 | 0.4 | 0.4 | 0.3 | 0.2 | 0.5 | 0.5 | 0.4 | 0.9 | 0.3 | 0.1 | 2.3 | 2.3 | 0.1 | 0.3 | 0.8 | 1.6 | 0.7 | 0.8 | 0.5 | 0.6 | 0.5 | 0.7 | 0.4 | 0.5 | 0.6 | 0.5 | 0.7 | 0.4 | 0.5 | 0.6 | 0.5 | 0.7 | 0.4 | 0.5 | 0.6 | 0.5 | 0.7 | 0.4 | 0.5 | 0.6 |
| L   | 0.9 | 0.4 | 0.4 | 0.3 | 0.2 | 0.5 | 0.5 | 0.4 | 0.9 | 0.3 | 0.1 | 2.3 | 2.3 | 0.1 | 0.3 | 0.8 | 1.6 | 0.7 | 0.8 | 0.5 | 0.6 | 0.5 | 0.7 | 0.4 | 0.5 | 0.6 | 0.5 | 0.7 | 0.4 | 0.5 | 0.6 | 0.5 | 0.7 | 0.4 | 0.5 | 0.6 | 0.5 | 0.7 | 0.4 | 0.5 | 0.6 |
| L   | 0.9 | 0.4 | 0.4 | 0.3 | 0.2 | 0.5 | 0.5 | 0.4 | 0.9 | 0.3 | 0.1 | 2.3 | 2.3 | 0.1 | 0.3 | 0.8 | 1.6 | 0.7 | 0.8 | 0.5 | 0.6 | 0.5 | 0.7 | 0.4 | 0.5 | 0.6 | 0.5 | 0.7 | 0.4 | 0.5 | 0.6 | 0.5 | 0.7 | 0.4 | 0.5 | 0.6 | 0.5 | 0.7 | 0.4 | 0.5 | 0.6 |
| L   | 0.9 | 0.4 | 0.4 | 0.3 | 0.2 | 0.5 | 0.5 | 0.4 | 0.9 | 0.3 | 0.1 | 2.3 | 2.3 | 0.1 | 0.3 | 0.8 | 1.6 | 0.7 | 0.8 | 0.5 | 0.6 | 0.5 | 0.7 | 0.4 | 0.5 | 0.6 | 0.5 | 0.7 | 0.4 | 0.5 | 0.6 | 0.5 | 0.7 | 0.4 | 0.5 | 0.6 | 0.5 | 0.7 | 0.4 | 0.5 | 0.6 |
| L   | 0.9 | 0.4 | 0.4 | 0.3 | 0.2 | 0.5 | 0.5 | 0.4 | 0.9 | 0.3 | 0.1 | 2.3 | 2.3 | 0.1 | 0.3 | 0.8 | 1.6 | 0.7 | 0.8 | 0.5 | 0.6 | 0.5 | 0.7 | 0.4 | 0.5 | 0.6 | 0.5 | 0.7 | 0.4 | 0.5 | 0.6 | 0.5 | 0.7 | 0.4 | 0.5 | 0.6 | 0.5 | 0.7 | 0.4 | 0.5 | 0.6 |
| L   | 0.9 | 0.4 | 0.4 | 0.3 | 0.2 | 0.5 | 0.5 | 0.4 | 0.9 | 0.3 | 0.1 | 2.3 | 2.3 | 0.1 | 0.3 | 0.8 | 1.6 | 0.7 | 0.8 | 0.5 | 0.6 | 0.5 | 0.7 | 0.4 | 0.5 | 0.6 | 0.5 | 0.7 | 0.4 | 0.5 | 0.6 | 0.5 | 0.7 | 0.4 | 0.5 | 0.6 | 0.5 | 0.7 | 0.4 | 0.5 | 0.6 |
| L   | 0.9 | 0.4 | 0.4 | 0.3 | 0.2 | 0.5 | 0.5 | 0.4 | 0.9 | 0.3 | 0.1 | 2.3 | 2.3 | 0.1 | 0.3 | 0.8 | 1.6 | 0.7 | 0.8 | 0.5 | 0.6 | 0.5 | 0.7 | 0.4 | 0.5 | 0.6 | 0.5 | 0.7 | 0.4 | 0.5 | 0.6 | 0.5 | 0.7 | 0.4 | 0.5 | 0.6 | 0.5 | 0.7 | 0.4 | 0.5 | 0.6 |
| L   | 0.9 | 0.4 | 0.4 | 0.3 | 0.2 | 0.5 | 0.5 | 0.4 | 0.9 | 0.3 | 0.1 | 2.3 | 2.3 | 0.1 | 0.3 | 0.8 | 1.6 | 0.7 | 0.8 | 0.5 | 0.6 | 0.5 | 0.7 | 0.4 | 0.5 | 0.6 | 0.5 | 0.7 | 0.4 | 0.5 | 0.6 | 0.5 | 0.7 | 0.4 | 0.5 | 0.6 | 0.5 | 0.7 | 0.4 | 0.5 | 0.6 |
| L   | 0.9 | 0.4 | 0.4 | 0.3 | 0.2 | 0.5 | 0.5 | 0.4 | 0.9 | 0.3 | 0.1 | 2.3 | 2.3 | 0.1 | 0.3 | 0.8 | 1.6 | 0.7 | 0.8 | 0.5 | 0.6 | 0.5 | 0.7 | 0.4 | 0.5 | 0.6 | 0.5 | 0.7 | 0.4 | 0.5 | 0.6 | 0.5 | 0.7 | 0.4 | 0.5 | 0.6 | 0.5 | 0.7 | 0.4 | 0.5 | 0.6 |
| L   | 0.9 | 0.4 | 0.4 | 0.3 | 0.2 | 0.5 | 0.5 | 0.4 | 0.9 | 0.3 | 0.1 | 2.3 | 2.3 | 0.1 | 0.3 | 0.8 | 1.6 | 0.7 | 0.8 | 0.5 | 0.6 | 0.5 | 0.7 | 0.4 | 0.5 | 0.6 | 0.5 | 0.7 | 0.4 | 0.5 | 0.6 | 0.5 | 0.7 | 0.4 | 0.5 | 0.6 | 0.5 | 0.7 | 0.4 | 0.5 | 0.6 |
| L   | 0.9 | 0.4 | 0.4 | 0.3 | 0.2 | 0.5 | 0.5 | 0.4 | 0.9 | 0.3 | 0.1 | 2.3 | 2.3 | 0.1 | 0.3 | 0.8 | 1.6 | 0.7 | 0.8 | 0.5 | 0.6 | 0.5 | 0.7 | 0.4 | 0.5 | 0.6 | 0.5 | 0.7 | 0.4 | 0.5 | 0.6 | 0.5 | 0.7 | 0.4 | 0.5 | 0.6 | 0.5 | 0.7 | 0.4 | 0.5 | 0.6 |
| L   | 0.9 | 0.4 | 0.4 | 0.3 | 0.2 | 0.5 | 0.5 | 0.4 | 0.9 | 0.3 | 0.1 | 2.3 | 2.3 | 0.1 | 0.3 | 0.8 | 1.6 | 0.7 | 0.8 | 0.5 | 0.6 | 0.5 | 0.7 | 0.4 | 0.5 | 0.6 | 0.5 | 0.7 | 0.4 | 0.5 | 0.6 | 0.5 | 0.7 | 0.4 | 0.5 | 0.6 | 0.5 | 0.7 | 0.4 | 0.5 | 0.6 |
| L   | 0.9 | 0.4 | 0.4 | 0.3 | 0.2 | 0.5 | 0.5 | 0.4 | 0.9 | 0.3 | 0.1 | 2.3 | 2.3 | 0.1 | 0.3 | 0.  |     |     |     |     |     |     |     |     |     |     |     |     |     |     |     |     |     |     |     |     |     |     |     |     |     |
